# Supplementary material for: Development and Psychometric Properties of a Questionnaire Assessing Self-Reported Generic Health Literacy in Adolescence
Source: MDPI journal article supplement (doi:10.3390/ijerph17082860), 2020-04-21

**Figure S1.** Response distribution of the 2nd draft of the MOHLAA-Q items (ceiling effects).

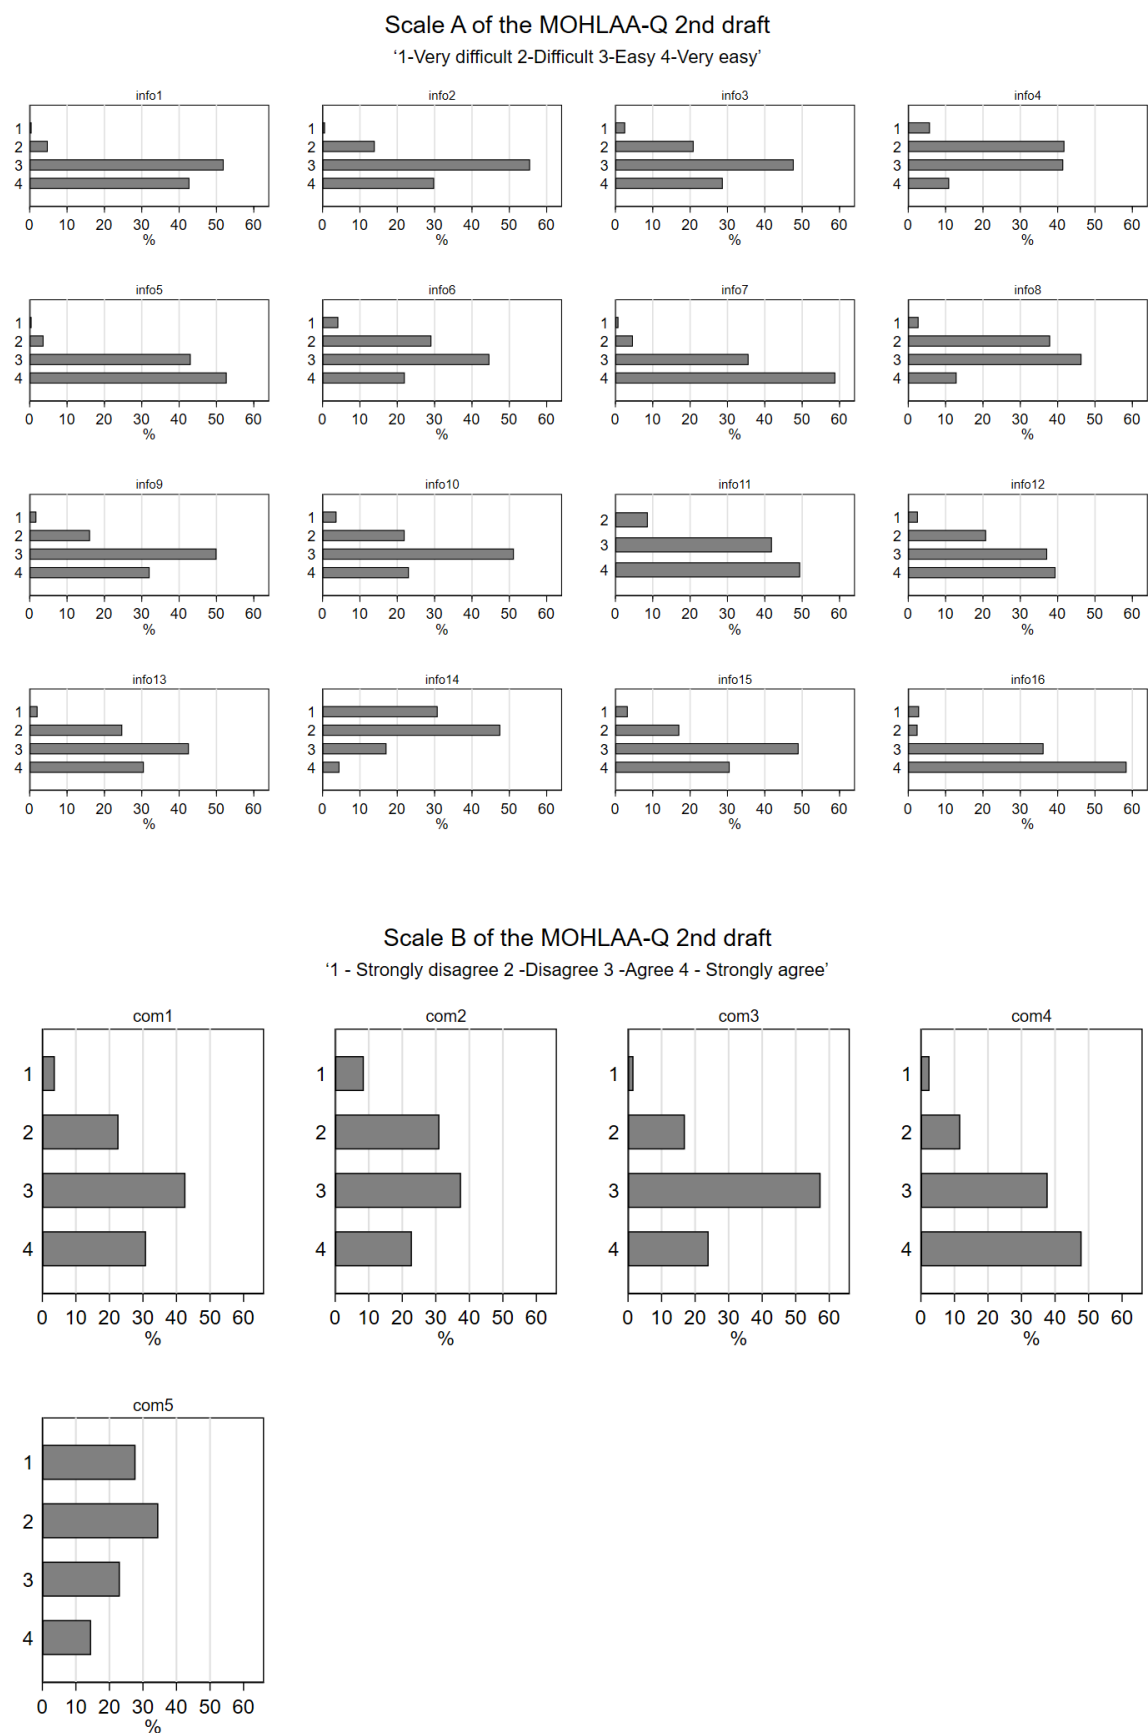

### Scale C of the MOHLAA-Q 2nd draft

'1 - Strongly disagree 2 -Agree 3 -Neutral 4 - Agree 5- Strongly agree'

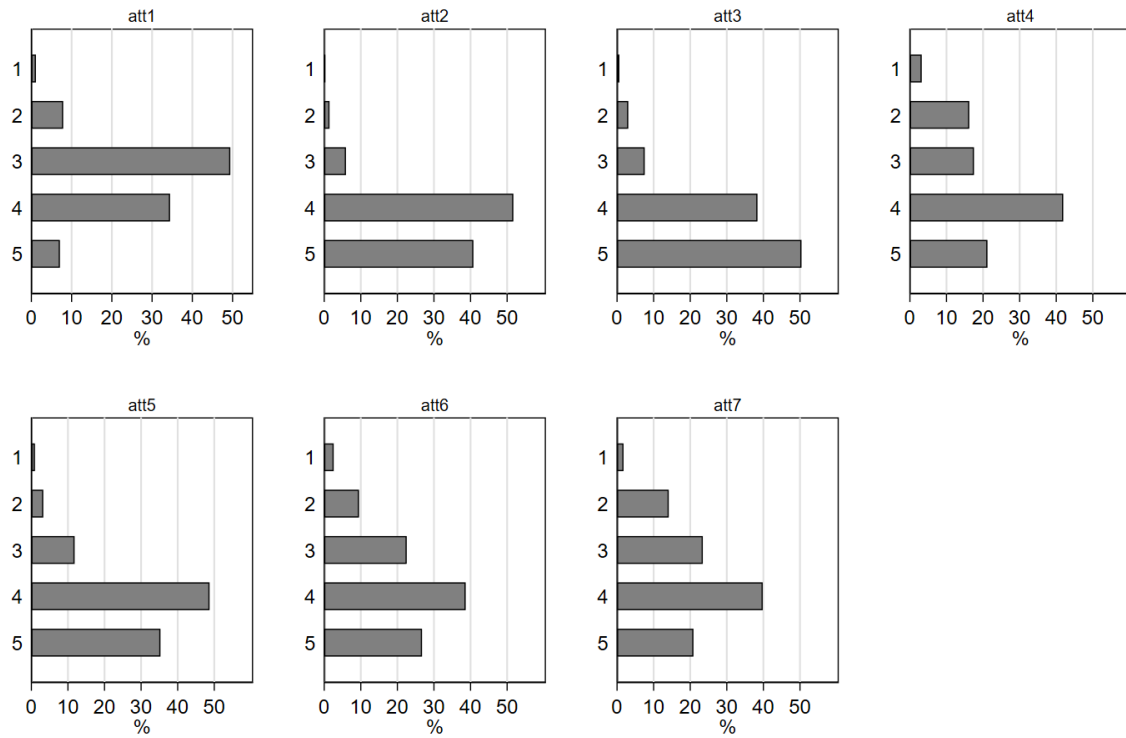

### Scale E of the MOHLAA-Q 2nd draft

'1 - Strongly disagree 2 -Disagree 3 -Agree 4 - Strongly agree'

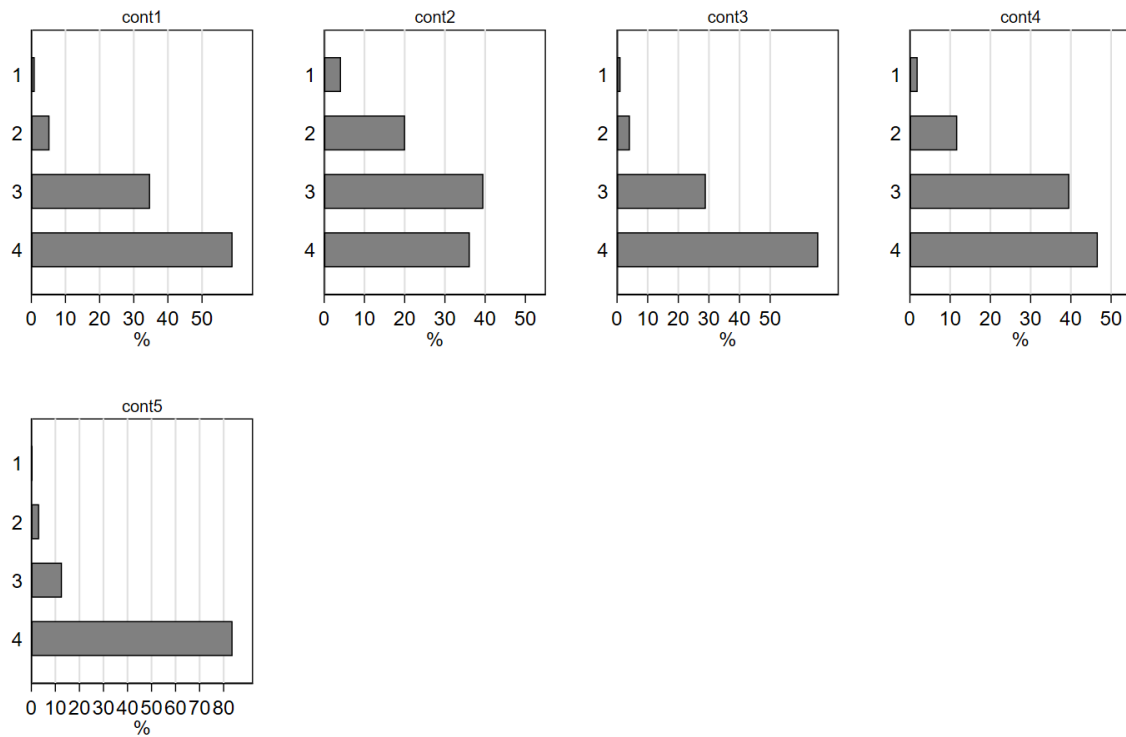

Supplement: s1 [file s1]
