# Supplementary material for: Development and Psychometric Properties of a Questionnaire Assessing Self-Reported Generic Health Literacy in Adolescence
Source: MDPI journal article supplement (doi:10.3390/ijerph17082860), 2020-04-21
Supplement: s1 [file s1]

**Figure S2** Final version of the Measurement Health Literacy Among Adolescents - Questionnaire (MOHLAA-Q)

| Scale A: Dealing with health-related information (HLS-EU-Q12-adolescents-DE)                                                                                                                      |                       |                       |                       |                       |
|---------------------------------------------------------------------------------------------------------------------------------------------------------------------------------------------------|-----------------------|-----------------------|-----------------------|-----------------------|
| How easy/difficult is it for you to . . . ?                                                                                                                                                       | very easy<br>(4)      | easy<br>(3)           | difficult<br>(2)      | very difficult<br>(1) |
| 1. ... find information about what to do when you feel ill to make yourself get better?                                                                                                           | <input type="radio"/> | <input type="radio"/> | <input type="radio"/> | <input type="radio"/> |
| 2. ...understand a medication leaflet                                                                                                                                                             | <input type="radio"/> | <input type="radio"/> | <input type="radio"/> | <input type="radio"/> |
| 3. ...judge whether information about medication in the media is credible?<br>media: internet, TV, radio, press                                                                                   | <input type="radio"/> | <input type="radio"/> | <input type="radio"/> | <input type="radio"/> |
| 4. ...follow the instructions of your doctor or pharmacist?                                                                                                                                       | <input type="radio"/> | <input type="radio"/> | <input type="radio"/> | <input type="radio"/> |
| 5. ...find information about how you can deal with mental problems? e.g., permanent stress, depression, being bullied, an eating disorder                                                         | <input type="radio"/> | <input type="radio"/> | <input type="radio"/> | <input type="radio"/> |
| 6. ...understand how you can protect yourself from sexually transmitted diseases?<br>By sexually transmitted diseases we mean diseases such as HIV/AIDS, chlamydia infection, or herpes           | <input type="radio"/> | <input type="radio"/> | <input type="radio"/> | <input type="radio"/> |
| 7. ...judge whether you can trust media when they warn you of risks to your health?                                                                                                               | <input type="radio"/> | <input type="radio"/> | <input type="radio"/> | <input type="radio"/> |
| 8. <u>...implement recommendations that protect you during sport, in your leisure time and in traffic? (e.g., wearing a helmet or knee or arm protectors, observing road traffic regulations)</u> | <input type="radio"/> | <input type="radio"/> | <input type="radio"/> | <input type="radio"/> |
| 9. ...find information about healthy behavior such as exercise and nutrition?                                                                                                                     | <input type="radio"/> | <input type="radio"/> | <input type="radio"/> | <input type="radio"/> |
| 10. ...understand information on food packaging?                                                                                                                                                  | <input type="radio"/> | <input type="radio"/> | <input type="radio"/> | <input type="radio"/> |

Please contact the authors ([MOHLAA@rki.de](mailto:MOHLAA@rki.de)) for using the instrument

|                                                                          |                                                                                                                                                           |                          |                              |                                        |                                 |                             |
|--------------------------------------------------------------------------|-----------------------------------------------------------------------------------------------------------------------------------------------------------|--------------------------|------------------------------|----------------------------------------|---------------------------------|-----------------------------|
| 11.                                                                      | <b>...judge how what you do daily affects your health?</b><br>e.g., eating, drinking, exercise, relaxation, body care                                     | <input type="radio"/>    | <input type="radio"/>        | <input type="radio"/>                  | <input type="radio"/>           |                             |
| 12.                                                                      | <b><u>...get involved in promoting a healthy environment?</u></b><br>e.g., less noise and less traffic, better air quality, more parks and sports grounds | <input type="radio"/>    | <input type="radio"/>        | <input type="radio"/>                  | <input type="radio"/>           |                             |
| <b>Scale B: Communication and interaction skills</b>                     |                                                                                                                                                           |                          |                              |                                        |                                 |                             |
| <i>To what extent do you agree with the following sentences?</i>         |                                                                                                                                                           | strongly<br>agree<br>(4) | somewhat<br>agree<br>(3)     | somewhat<br>disagree<br>(2)            | strongly<br>disagree<br>(1)     |                             |
| 13.                                                                      | <b><u>During my last visit to the doctor, I asked all the questions that interested me.</u></b>                                                           | <input type="radio"/>    | <input type="radio"/>        | <input type="radio"/>                  | <input type="radio"/>           |                             |
| 14.                                                                      | <b>I chat with my friends about how one can avoid unhealthy behavior e.g., smoking, drinking alcohol over the limit</b>                                   | <input type="radio"/>    | <input type="radio"/>        | <input type="radio"/>                  | <input type="radio"/>           |                             |
| 15.                                                                      | <b>If my friends or siblings have questions about health, I can help them.</b>                                                                            | <input type="radio"/>    | <input type="radio"/>        | <input type="radio"/>                  | <input type="radio"/>           |                             |
| 16.                                                                      | <b>It is easy for me to talk with my parents about health topics.</b>                                                                                     | <input type="radio"/>    | <input type="radio"/>        | <input type="radio"/>                  | <input type="radio"/>           |                             |
| <b>Scale C: Attitudes toward one's own health and health information</b> |                                                                                                                                                           |                          |                              |                                        |                                 |                             |
|                                                                          |                                                                                                                                                           | not at all<br>(1)        | little<br>(2)                | moderate<br>(3)                        | strong<br>(4)                   | very strong<br>(5)          |
| 17.                                                                      | How much in general do you pay attention to your health?                                                                                                  | <input type="radio"/>    | <input type="radio"/>        | <input type="radio"/>                  | <input type="radio"/>           | <input type="radio"/>       |
| <i>To what extent do you agree to the following sentences?</i>           |                                                                                                                                                           | strongly<br>agree<br>(5) | somew<br>hat<br>agree<br>(4) | neither<br>agree or<br>disagree<br>(3) | somewh<br>at<br>disagree<br>(2) | strongly<br>disagree<br>(1) |
| 18.                                                                      | <b>I seek advice from others when I am ill.</b>                                                                                                           | <input type="radio"/>    | <input type="radio"/>        | <input type="radio"/>                  | <input type="radio"/>           | <input type="radio"/>       |
| 19.                                                                      | <b>It is up to me to protect myself from diseases.</b>                                                                                                    | <input type="radio"/>    | <input type="radio"/>        | <input type="radio"/>                  | <input type="radio"/>           | <input type="radio"/>       |
| 20.                                                                      | <b><u>I know what I have to do to make myself feel comfortable.</u></b>                                                                                   | <input type="radio"/>    | <input type="radio"/>        | <input type="radio"/>                  | <input type="radio"/>           | <input type="radio"/>       |
| 21.                                                                      | <b>It is important to me to inform myself about health-related topics.</b>                                                                                | <input type="radio"/>    | <input type="radio"/>        | <input type="radio"/>                  | <input type="radio"/>           | <input type="radio"/>       |

Please contact the authors ([MOHLAA@rki.de](mailto:MOHLAA@rki.de)) for using the instrument

### Scale D: Health-related knowledge

|                                                                                                                                                                                                                                                                                                                                                                             |
|-----------------------------------------------------------------------------------------------------------------------------------------------------------------------------------------------------------------------------------------------------------------------------------------------------------------------------------------------------------------------------|
| 1. <b>How often should a young person at your age be physically active?</b> <i>Only one answer is correct.</i>                                                                                                                                                                                                                                                              |
| <input type="radio"/> Up to two hours of sport per week is sufficient (0)<br><input type="radio"/> Physical education lessons at school are sufficient (0)<br><input type="radio"/> About an hour every day while one's works up a sweat, is sufficient (1)<br><input type="radio"/> Three times a week exercise is sufficient (0)<br><input type="radio"/> Do not know (0) |
| 2. <b>How does it affect the body if you regularly drink a lot of alcohol?</b> <i>Only one answer is correct.</i>                                                                                                                                                                                                                                                           |
| <input type="radio"/> Almost all organs are damaged (1)<br><input type="radio"/> Only the liver and brain are damaged (0)<br><input type="radio"/> It depends on how much the body can tolerate (0)<br><input type="radio"/> The lung volume decreases (0)<br><input type="radio"/> Do not know (0)                                                                         |
| 3. <b>What are the health effects for young people of consuming cannabis (marijuana, hashish) often?</b> <i>Only one answer is correct.</i>                                                                                                                                                                                                                                 |
| <input type="radio"/> Poorer learning and memory skills (1)<br><input type="radio"/> Permanent brain damage (0)<br><input type="radio"/> Hair loss (0)<br><input type="radio"/> Only physical dependence (0)<br><input type="radio"/> Do not know (0)                                                                                                                       |
| 4. <b>What is NOT one of the possible effects of smoking?</b> <i>Only one answer is correct.</i>                                                                                                                                                                                                                                                                            |
| <input type="radio"/> Tooth loss (0)<br><input type="radio"/> Skin aging (0)<br><input type="radio"/> Nearsightedness (1)<br><input type="radio"/> Decreased muscular strength (0)<br><input type="radio"/> Do not know (0)                                                                                                                                                 |
| 5. <b>How can small burns be treated?</b> <i>Only one answer is correct.</i>                                                                                                                                                                                                                                                                                                |
| <input type="radio"/> Sprinkle flour on the wound (0)<br><input type="radio"/> Cool for 10 minutes under lukewarm water (1)<br><input type="radio"/> Always pierce blisters from burns (0)<br><input type="radio"/> Cool only with sterile saline solution (0)<br><input type="radio"/> Do not know (0)                                                                     |

|                                                                                                                                                                                                                                                                                                                                                                                                                                         |                                                                                                                                                                                                                                                        |
|-----------------------------------------------------------------------------------------------------------------------------------------------------------------------------------------------------------------------------------------------------------------------------------------------------------------------------------------------------------------------------------------------------------------------------------------|--------------------------------------------------------------------------------------------------------------------------------------------------------------------------------------------------------------------------------------------------------|
|                                                                                                                                                                                                                                                                                                                                                                                                                                         |                                                                                                                                                                                                                                                        |
| 6.                                                                                                                                                                                                                                                                                                                                                                                                                                      | <b>Which ingredient is contained in the highest amount in a cocoa drink powder with the ingredients listed on the package as follows: sugar, dextrose, low-fat cocoa powder, emulsifier agent (lecithin), salt?</b> <i>Only one answer is correct.</i> |
| <input type="radio"/> Salt (0)<br><input type="radio"/> Dextrose (0)<br><input type="radio"/> Sugar (1)<br><input type="radio"/> Cocoa powder (0)<br><input type="radio"/> Do not know (0)                                                                                                                                                                                                                                              |                                                                                                                                                                                                                                                        |
| 7.                                                                                                                                                                                                                                                                                                                                                                                                                                      | <b>We want to know if you know what your rights are. <u>One of the following sentences is WRONG. Which sentence is that?</u></b> <i>Only one answer is correct.</i>                                                                                    |
| <input type="radio"/> I can disagree to a major medical surgery, even if my parents have agreed. (0)<br><input type="radio"/> I have to agree before my doctor will inform my parents about my treatment. (0)<br><input type="radio"/> I have the right for the doctor to inform me about the advantages and disadvantages of my treatment. (0)<br><input type="radio"/> I have no rights. (1)<br><input type="radio"/> Do not know (0) |                                                                                                                                                                                                                                                        |
| 8.                                                                                                                                                                                                                                                                                                                                                                                                                                      | <b>How can HIV/AIDS be transmitted?</b> <i>Only one answer is correct</i>                                                                                                                                                                              |
| <input type="radio"/> Kissing (0)<br><input type="radio"/> Skin contact such as shaking hands (0)<br><input type="radio"/> Insect bites (0)<br><input type="radio"/> None of the given answers is correct (1)<br><input type="radio"/> Do not know (0)                                                                                                                                                                                  |                                                                                                                                                                                                                                                        |

*Legend:* The point values for the given answer option are provided in parentheses.

Underlined items were adjusted based on the results of the item and reliability analyses, and CFA.
